# Supplementary material for: Integrated Analysis of microRNA and mRNA Transcriptome Reveals the Molecular Mechanism of Solanum lycopersicum Response to Bemisia tabaci and Tomato chlorosis virus
Source: Front Microbiol. 2021 Jun 22;12:693574. doi: 10.3389/fmicb.2021.693574 (PMC8258350; doi:10.3389/fmicb.2021.693574)
Supplement: Supplementary Table 8 — KEGG enrichment analysis of target genes. [file Table_8.XLSX]

## Sheet: KEGG富集分析统计表
Table S8. KEGG enrichment analysis of target genes.
Group	Regulated	Num	Pathway id	Description	Database	Ratio_in_study	Ratio_in_pop	Pvalue
H_vs_HQ	Up	1	map03440	Homologous recombination	KEGG PATHWAY	1/14	179/13903	0.165986
		2	map04144	Endocytosis	KEGG PATHWAY	2/14	262/13903	0.0277308
		1	map03430	Mismatch repair	KEGG PATHWAY	1/14	154/13903	0.144452
		1	map03420	Nucleotide excision repair	KEGG PATHWAY	1/14	130/13903	0.123295
		1	map03030	DNA replication	KEGG PATHWAY	1/14	119/13903	0.113437
		1	map04217	Necroptosis	KEGG PATHWAY	1/14	113/13903	0.108016
H_vs_HQ	Down	4	map00230	Purine metabolism	KEGG PATHWAY	4/23	268/13903	0.000895469
		3	map03020	RNA polymerase	KEGG PATHWAY	3/23	115/13903	0.000865356
		3	map00240	Pyrimidine metabolism	KEGG PATHWAY	3/23	226/13903	0.00590409
		2	map00999	Biosynthesis of various secondary metabolites - part 1	KEGG PATHWAY	2/23	65/13903	0.00511118
		2	map03018	RNA degradation	KEGG PATHWAY	2/23	167/13903	0.0307608
		1	map00280	Valine, leucine and isoleucine degradation	KEGG PATHWAY	1/23	90/13903	0.138854
		1	map00030	Pentose phosphate pathway	KEGG PATHWAY	1/23	72/13903	0.11265
		1	map00260	Glycine, serine and threonine metabolism	KEGG PATHWAY	1/23	84/13903	0.130203
		1	map03050	Proteasome	KEGG PATHWAY	1/23	65/13903	0.102254
		1	map00250	Alanine, aspartate and glutamate metabolism	KEGG PATHWAY	1/23	62/13903	0.0977637
		1	map00270	Cysteine and methionine metabolism	KEGG PATHWAY	1/23	133/13903	0.198491
		1	map03040	Spliceosome	KEGG PATHWAY	1/23	252/13903	0.343642
		1	map00520	Amino sugar and nucleotide sugar metabolism	KEGG PATHWAY	1/23	222/13903	0.309624
		1	map04120	Ubiquitin mediated proteolysis	KEGG PATHWAY	1/23	222/13903	0.309624
		1	map03010	Ribosome	KEGG PATHWAY	1/23	489/13903	0.561412
H_vs_V	Up	1	map00513	Various types of N-glycan biosynthesis	KEGG PATHWAY	1/185	36/13903	0.382985
		1	map02010	ABC transporters	KEGG PATHWAY	1/185	65/13903	0.5822
		1	map03022	Basal transcription factors	KEGG PATHWAY	1/185	48/13903	0.474863
		2	map05225	Hepatocellular carcinoma	KEGG PATHWAY	2/185	117/13903	0.463004
		3	map00010	Glycolysis / Gluconeogenesis	KEGG PATHWAY	3/185	174/13903	0.409084
		2	map04218	Cellular senescence	KEGG PATHWAY	2/185	127/13903	0.506035
		1	map00380	Tryptophan metabolism	KEGG PATHWAY	1/185	64/13903	0.576539
		1	map00062	Fatty acid elongation	KEGG PATHWAY	1/185	45/13903	0.453255
		1	map05226	Gastric cancer	KEGG PATHWAY	1/185	55/13903	0.522033
		1	map00510	N-Glycan biosynthesis	KEGG PATHWAY	1/185	51/13903	0.49562
		1	map00250	Alanine, aspartate and glutamate metabolism	KEGG PATHWAY	1/185	62/13903	0.564987
		1	map00460	Cyanoamino acid metabolism	KEGG PATHWAY	1/185	60/13903	0.553122
		1	map00400	Phenylalanine, tyrosine and tryptophan biosynthesis	KEGG PATHWAY	1/185	58/13903	0.540936
		1	map00040	Pentose and glucuronate interconversions	KEGG PATHWAY	1/185	172/13903	0.901575
		1	map00480	Glutathione metabolism	KEGG PATHWAY	1/185	127/13903	0.818967
		2	map00230	Purine metabolism	KEGG PATHWAY	2/185	268/13903	0.875152
		3	map04141	Protein processing in endoplasmic reticulum	KEGG PATHWAY	3/185	324/13903	0.809359
		1	map03018	RNA degradation	KEGG PATHWAY	1/185	167/13903	0.89467
		1	map00280	Valine, leucine and isoleucine degradation	KEGG PATHWAY	1/185	90/13903	0.701661
		2	map00630	Glyoxylate and dicarboxylate metabolism	KEGG PATHWAY	2/185	99/13903	0.380442
		2	map04113	Meiosis - yeast	KEGG PATHWAY	2/185	99/13903	0.380442
		1	map03015	mRNA surveillance pathway	KEGG PATHWAY	1/185	154/13903	0.874377
		1	map05165	Human papillomavirus infection	KEGG PATHWAY	1/185	147/13903	0.861885
		2	map00240	Pyrimidine metabolism	KEGG PATHWAY	2/185	226/13903	0.806355
		1	map04120	Ubiquitin mediated proteolysis	KEGG PATHWAY	1/185	222/13903	0.950109
		2	map03040	Spliceosome	KEGG PATHWAY	2/185	252/13903	0.852104
		2	map00500	Starch and sucrose metabolism	KEGG PATHWAY	2/185	181/13903	0.697431
		2	map00520	Amino sugar and nucleotide sugar metabolism	KEGG PATHWAY	2/185	222/13903	0.798297
		2	map04714	Thermogenesis	KEGG PATHWAY	2/185	344/13903	0.945836
		2	map03013	RNA transport	KEGG PATHWAY	2/185	218/13903	0.789945
		1	map00220	Arginine biosynthesis	KEGG PATHWAY	1/185	44/13903	0.445858
		1	map00910	Nitrogen metabolism	KEGG PATHWAY	1/185	44/13903	0.445858
		1	map04139	Mitophagy - yeast	KEGG PATHWAY	1/185	84/13903	0.676528
		1	map00790	Folate biosynthesis	KEGG PATHWAY	1/185	35/13903	0.374642
		1	map00410	beta-Alanine metabolism	KEGG PATHWAY	1/185	75/13903	0.634828
		1	map03060	Protein export	KEGG PATHWAY	1/185	78/13903	0.64929
		2	map04111	Cell cycle - yeast	KEGG PATHWAY	2/185	170/13903	0.664122
		1	map00051	Fructose and mannose metabolism	KEGG PATHWAY	1/185	88/13903	0.693507
		4	map00270	Cysteine and methionine metabolism	KEGG PATHWAY	4/185	133/13903	0.101657
		1	map04145	Phagosome	KEGG PATHWAY	1/185	105/13903	0.756316
		1	map03020	RNA polymerase	KEGG PATHWAY	1/185	115/13903	0.787095
		2	map00561	Glycerolipid metabolism	KEGG PATHWAY	2/185	96/13903	0.366144
		1	map04138	Autophagy - yeast	KEGG PATHWAY	1/185	104/13903	0.753005
		5	map03010	Ribosome	KEGG PATHWAY	5/185	489/13903	0.783947
		1	map00760	Nicotinate and nicotinamide metabolism	KEGG PATHWAY	1/185	33/13903	0.35762
		4	map00310	Lysine degradation	KEGG PATHWAY	4/185	81/13903	0.0228344
		3	map00970	Aminoacyl-tRNA biosynthesis	KEGG PATHWAY	3/185	66/13903	0.0576822
		3	map00052	Galactose metabolism	KEGG PATHWAY	3/185	73/13903	0.0733879
		4	map03030	DNA replication	KEGG PATHWAY	4/185	119/13903	0.0744296
		5	map03440	Homologous recombination	KEGG PATHWAY	5/185	179/13903	0.0909554
		4	map03420	Nucleotide excision repair	KEGG PATHWAY	4/185	130/13903	0.095477
		2	map03410	Base excision repair	KEGG PATHWAY	2/185	49/13903	0.13829
		1	map00300	Lysine biosynthesis	KEGG PATHWAY	1/185	12/13903	0.148549
		4	map03430	Mismatch repair	KEGG PATHWAY	4/185	154/13903	0.149681
		3	map00620	Pyruvate metabolism	KEGG PATHWAY	3/185	118/13903	0.207726
		2	map00020	Citrate cycle (TCA cycle)	KEGG PATHWAY	2/185	65/13903	0.214245
		2	map03050	Proteasome	KEGG PATHWAY	2/185	65/13903	0.214245
		1	map03450	Non-homologous end-joining	KEGG PATHWAY	1/185	18/13903	0.214373
		2	map00330	Arginine and proline metabolism	KEGG PATHWAY	2/185	75/13903	0.263473
		1	map00531	Glycosaminoglycan degradation	KEGG PATHWAY	1/185	23/13903	0.265341
		5	map04144	Endocytosis	KEGG PATHWAY	5/185	262/13903	0.270356
		2	map04011	MAPK signaling pathway - yeast	KEGG PATHWAY	2/185	81/13903	0.293099
		2	map00562	Inositol phosphate metabolism	KEGG PATHWAY	2/185	83/13903	0.302947
		1	map00590	Arachidonic acid metabolism	KEGG PATHWAY	1/185	31/13903	0.340136
		2	map04070	Phosphatidylinositol signaling system	KEGG PATHWAY	2/185	92/13903	0.346891
		2	map03008	Ribosome biogenesis in eukaryotes	KEGG PATHWAY	2/185	93/13903	0.351723
		2	map00360	Phenylalanine metabolism	KEGG PATHWAY	2/185	93/13903	0.351723
H_vs_V	Down	17	map00520	Amino sugar and nucleotide sugar metabolism	KEGG PATHWAY	17/82	222/13903	9.98786e-15
		4	map00040	Pentose and glucuronate interconversions	KEGG PATHWAY	4/82	172/13903	0.01875
		1	map00562	Inositol phosphate metabolism	KEGG PATHWAY	1/82	83/13903	0.388868
		1	map00920	Sulfur metabolism	KEGG PATHWAY	1/82	45/13903	0.234036
		1	map00909	Sesquiterpenoid and triterpenoid biosynthesis	KEGG PATHWAY	1/82	42/13903	0.220278
		2	map05225	Hepatocellular carcinoma	KEGG PATHWAY	2/82	117/13903	0.151574
		1	map00590	Arachidonic acid metabolism	KEGG PATHWAY	1/82	31/13903	0.167713
		1	map00561	Glycerolipid metabolism	KEGG PATHWAY	1/82	96/13903	0.434384
		1	map00600	Sphingolipid metabolism	KEGG PATHWAY	1/82	34/13903	0.182387
		4	map04120	Ubiquitin mediated proteolysis	KEGG PATHWAY	4/82	222/13903	0.0421602
		1	map00310	Lysine degradation	KEGG PATHWAY	1/82	81/13903	0.381551
		1	map04011	MAPK signaling pathway - yeast	KEGG PATHWAY	1/82	81/13903	0.381551
		1	map03008	Ribosome biogenesis in eukaryotes	KEGG PATHWAY	1/82	93/13903	0.424187
		1	map00591	Linoleic acid metabolism	KEGG PATHWAY	1/82	50/13903	0.256434
		2	map04144	Endocytosis	KEGG PATHWAY	2/82	262/13903	0.45944
		1	map04934	Cushing syndrome	KEGG PATHWAY	1/82	41/13903	0.215638
		1	map00565	Ether lipid metabolism	KEGG PATHWAY	1/82	38/13903	0.201554
		1	map00400	Phenylalanine, tyrosine and tryptophan biosynthesis	KEGG PATHWAY	1/82	58/13903	0.290933
		1	map00740	Riboflavin metabolism	KEGG PATHWAY	1/82	21/13903	0.116898
		2	map04070	Phosphatidylinositol signaling system	KEGG PATHWAY	2/82	92/13903	0.102476
		1	map05226	Gastric cancer	KEGG PATHWAY	1/82	55/13903	0.278185
		1	map00592	alpha-Linolenic acid metabolism	KEGG PATHWAY	1/82	73/13903	0.35141
		1	map00563	Glycosylphosphatidylinositol (GPI)-anchor biosynthesis	KEGG PATHWAY	1/82	27/13903	0.147743
		1	map04928	Parathyroid hormone synthesis, secretion and action	KEGG PATHWAY	1/82	79/13903	0.374148
		1	map00071	Fatty acid degradation	KEGG PATHWAY	1/82	79/13903	0.374148
		1	map00511	Other glycan degradation	KEGG PATHWAY	1/82	16/13903	0.0903531
		1	map00999	Biosynthesis of various secondary metabolites - part 1	KEGG PATHWAY	1/82	65/13903	0.319819
		1	map02010	ABC transporters	KEGG PATHWAY	1/82	65/13903	0.319819
		1	map03050	Proteasome	KEGG PATHWAY	1/82	65/13903	0.319819
		1	map03420	Nucleotide excision repair	KEGG PATHWAY	1/82	130/13903	0.538195
		1	map04218	Cellular senescence	KEGG PATHWAY	1/82	127/13903	0.529848
		2	map00564	Glycerophospholipid metabolism	KEGG PATHWAY	2/82	115/13903	0.147486
		2	map00900	Terpenoid backbone biosynthesis	KEGG PATHWAY	2/82	81/13903	0.0826112
		1	map05165	Human papillomavirus infection	KEGG PATHWAY	1/82	147/13903	0.582798
		2	map00052	Galactose metabolism	KEGG PATHWAY	2/82	73/13903	0.0690289
		1	map03018	RNA degradation	KEGG PATHWAY	1/82	167/13903	0.62985
		1	map00500	Starch and sucrose metabolism	KEGG PATHWAY	1/82	181/13903	0.659627
		1	map03013	RNA transport	KEGG PATHWAY	1/82	218/13903	0.727406
		2	map03010	Ribosome	KEGG PATHWAY	2/82	489/13903	0.789161
		1	map03040	Spliceosome	KEGG PATHWAY	1/82	252/13903	0.777841
		1	map00190	Oxidative phosphorylation	KEGG PATHWAY	1/82	358/13903	0.882989
		1	map04714	Thermogenesis	KEGG PATHWAY	1/82	344/13903	0.872612
H_vs_VQ	Up	7	map00310	Lysine degradation	KEGG PATHWAY	7/271	81/13903	0.00100634
		3	map00590	Arachidonic acid metabolism	KEGG PATHWAY	3/271	31/13903	0.0220164
		3	map00770	Pantothenate and CoA biosynthesis	KEGG PATHWAY	3/271	39/13903	0.0399827
		1	map00791	Atrazine degradation	KEGG PATHWAY	1/271	1/13903	0.0194922
		5	map00561	Glycerolipid metabolism	KEGG PATHWAY	5/271	96/13903	0.0395693
		3	map00920	Sulfur metabolism	KEGG PATHWAY	3/271	45/13903	0.0570756
		4	map00380	Tryptophan metabolism	KEGG PATHWAY	4/271	64/13903	0.0360652
		7	map00270	Cysteine and methionine metabolism	KEGG PATHWAY	7/271	133/13903	0.0153946
		4	map00562	Inositol phosphate metabolism	KEGG PATHWAY	4/271	83/13903	0.0787978
		4	map04070	Phosphatidylinositol signaling system	KEGG PATHWAY	4/271	92/13903	0.10507
		2	map00460	Cyanoamino acid metabolism	KEGG PATHWAY	2/271	60/13903	0.327051
		3	map00250	Alanine, aspartate and glutamate metabolism	KEGG PATHWAY	3/271	62/13903	0.120253
		3	map00020	Citrate cycle (TCA cycle)	KEGG PATHWAY	3/271	65/13903	0.133307
		2	map00400	Phenylalanine, tyrosine and tryptophan biosynthesis	KEGG PATHWAY	2/271	58/13903	0.312685
		1	map00450	Selenocompound metabolism	KEGG PATHWAY	1/271	20/13903	0.325623
		3	map00360	Phenylalanine metabolism	KEGG PATHWAY	3/271	93/13903	0.272107
		2	map04111	Cell cycle - yeast	KEGG PATHWAY	2/271	170/13903	0.847489
		1	map04138	Autophagy - yeast	KEGG PATHWAY	1/271	104/13903	0.871895
		1	map03450	Non-homologous end-joining	KEGG PATHWAY	1/271	18/13903	0.298506
		1	map04933	AGE-RAGE signaling pathway in diabetic complications	KEGG PATHWAY	1/271	18/13903	0.298506
		2	map04130	SNARE interactions in vesicular transport	KEGG PATHWAY	2/271	45/13903	0.218625
		2	map00970	Aminoacyl-tRNA biosynthesis	KEGG PATHWAY	2/271	66/13903	0.369607
		2	map03440	Homologous recombination	KEGG PATHWAY	2/271	179/13903	0.867248
		7	map03010	Ribosome	KEGG PATHWAY	7/271	489/13903	0.844804
		2	map00591	Linoleic acid metabolism	KEGG PATHWAY	2/271	50/13903	0.254767
		2	map00860	Porphyrin and chlorophyll metabolism	KEGG PATHWAY	2/271	55/13903	0.291021
		1	map03020	RNA polymerase	KEGG PATHWAY	1/271	115/13903	0.897014
		2	map03018	RNA degradation	KEGG PATHWAY	2/271	167/13903	0.840332
		2	map03015	mRNA surveillance pathway	KEGG PATHWAY	2/271	154/13903	0.805699
		1	map00280	Valine, leucine and isoleucine degradation	KEGG PATHWAY	1/271	90/13903	0.830918
		2	map00220	Arginine biosynthesis	KEGG PATHWAY	2/271	44/13903	0.211445
		1	map00511	Other glycan degradation	KEGG PATHWAY	1/271	16/13903	0.270303
		1	map00531	Glycosaminoglycan degradation	KEGG PATHWAY	1/271	23/13903	0.364352
		1	map00051	Fructose and mannose metabolism	KEGG PATHWAY	1/271	88/13903	0.824084
		3	map03013	RNA transport	KEGG PATHWAY	3/271	218/13903	0.801318
		3	map00564	Glycerophospholipid metabolism	KEGG PATHWAY	3/271	115/13903	0.389298
		1	map00010	Glycolysis / Gluconeogenesis	KEGG PATHWAY	1/271	174/13903	0.968154
		6	map04144	Endocytosis	KEGG PATHWAY	6/271	262/13903	0.403122
		1	map04714	Thermogenesis	KEGG PATHWAY	1/271	344/13903	0.998948
		1	map04120	Ubiquitin mediated proteolysis	KEGG PATHWAY	1/271	222/13903	0.987789
		2	map00565	Ether lipid metabolism	KEGG PATHWAY	2/271	38/13903	0.169013
		3	map00592	alpha-Linolenic acid metabolism	KEGG PATHWAY	3/271	73/13903	0.170282
		3	map00330	Arginine and proline metabolism	KEGG PATHWAY	3/271	75/13903	0.17995
		4	map00620	Pyruvate metabolism	KEGG PATHWAY	4/271	118/13903	0.198625
		1	map00300	Lysine biosynthesis	KEGG PATHWAY	1/271	12/13903	0.210465
		2	map00100	Steroid biosynthesis	KEGG PATHWAY	2/271	49/13903	0.247517
		2	map03410	Base excision repair	KEGG PATHWAY	2/271	49/13903	0.247517
		3	map00480	Glutathione metabolism	KEGG PATHWAY	3/271	127/13903	0.451639
		1	map00290	Valine, leucine and isoleucine biosynthesis	KEGG PATHWAY	1/271	32/13903	0.467738
		2	map04011	MAPK signaling pathway - yeast	KEGG PATHWAY	2/271	81/13903	0.470608
		1	map00760	Nicotinate and nicotinamide metabolism	KEGG PATHWAY	1/271	33/13903	0.478137
		1	map00600	Sphingolipid metabolism	KEGG PATHWAY	1/271	34/13903	0.488334
		2	map04139	Mitophagy - yeast	KEGG PATHWAY	2/271	84/13903	0.489648
		1	map00790	Folate biosynthesis	KEGG PATHWAY	1/271	35/13903	0.498332
		1	map00513	Various types of N-glycan biosynthesis	KEGG PATHWAY	1/271	36/13903	0.508135
		2	map03008	Ribosome biogenesis in eukaryotes	KEGG PATHWAY	2/271	93/13903	0.544116
		2	map04113	Meiosis - yeast	KEGG PATHWAY	2/271	99/13903	0.578124
		2	map00630	Glyoxylate and dicarboxylate metabolism	KEGG PATHWAY	2/271	99/13903	0.578124
		1	map00910	Nitrogen metabolism	KEGG PATHWAY	1/271	44/13903	0.579992
		1	map00062	Fatty acid elongation	KEGG PATHWAY	1/271	45/13903	0.588205
		1	map03022	Basal transcription factors	KEGG PATHWAY	1/271	48/13903	0.611896
		4	map00520	Amino sugar and nucleotide sugar metabolism	KEGG PATHWAY	4/271	222/13903	0.631954
		1	map00510	N-Glycan biosynthesis	KEGG PATHWAY	1/271	51/13903	0.634228
		1	map00904	Diterpenoid biosynthesis	KEGG PATHWAY	1/271	51/13903	0.634228
		2	map05225	Hepatocellular carcinoma	KEGG PATHWAY	2/271	117/13903	0.668833
		2	map03030	DNA replication	KEGG PATHWAY	2/271	119/13903	0.677878
		3	map00500	Starch and sucrose metabolism	KEGG PATHWAY	3/271	181/13903	0.688884
		2	map04146	Peroxisome	KEGG PATHWAY	2/271	125/13903	0.703809
		2	map04218	Cellular senescence	KEGG PATHWAY	2/271	127/13903	0.71206
		1	map00999	Biosynthesis of various secondary metabolites - part 1	KEGG PATHWAY	1/271	65/13903	0.722653
		2	map03420	Nucleotide excision repair	KEGG PATHWAY	2/271	130/13903	0.724076
		5	map04141	Protein processing in endoplasmic reticulum	KEGG PATHWAY	5/271	324/13903	0.760943
		1	map00350	Tyrosine metabolism	KEGG PATHWAY	1/271	74/13903	0.76789
		4	map00230	Purine metabolism	KEGG PATHWAY	4/271	268/13903	0.770562
		1	map00410	beta-Alanine metabolism	KEGG PATHWAY	1/271	75/13903	0.772438
		2	map05165	Human papillomavirus infection	KEGG PATHWAY	2/271	147/13903	0.784412
		1	map03060	Protein export	KEGG PATHWAY	1/271	78/13903	0.785558
		1	map04928	Parathyroid hormone synthesis, secretion and action	KEGG PATHWAY	1/271	79/13903	0.789761
		1	map00071	Fatty acid degradation	KEGG PATHWAY	1/271	79/13903	0.789761
		1	map04213	Longevity regulating pathway - multiple species	KEGG PATHWAY	1/271	79/13903	0.789761
		2	map00240	Pyrimidine metabolism	KEGG PATHWAY	2/271	226/13903	0.937239
		1	map03430	Mismatch repair	KEGG PATHWAY	1/271	154/13903	0.952566
		2	map03040	Spliceosome	KEGG PATHWAY	2/271	252/13903	0.959133
		1	map00040	Pentose and glucuronate interconversions	KEGG PATHWAY	1/271	172/13903	0.966858
H_vs_VQ	Down	17	map00520	Amino sugar and nucleotide sugar metabolism	KEGG PATHWAY	17/120	222/13903	6.85912e-12
		2	map00511	Other glycan degradation	KEGG PATHWAY	2/120	16/13903	0.00819157
		5	map00040	Pentose and glucuronate interconversions	KEGG PATHWAY	5/120	172/13903	0.0166608
		5	map04120	Ubiquitin mediated proteolysis	KEGG PATHWAY	5/120	222/13903	0.043281
		1	map00563	Glycosylphosphatidylinositol (GPI)-anchor biosynthesis	KEGG PATHWAY	1/120	27/13903	0.208856
		4	map04144	Endocytosis	KEGG PATHWAY	4/120	262/13903	0.190759
		3	map00500	Starch and sucrose metabolism	KEGG PATHWAY	3/120	181/13903	0.205689
		2	map00920	Sulfur metabolism	KEGG PATHWAY	2/120	45/13903	0.0575034
		3	map03018	RNA degradation	KEGG PATHWAY	3/120	167/13903	0.175149
		2	map04070	Phosphatidylinositol signaling system	KEGG PATHWAY	2/120	92/13903	0.188497
		1	map00670	One carbon pool by folate	KEGG PATHWAY	1/120	21/13903	0.166544
		2	map03420	Nucleotide excision repair	KEGG PATHWAY	2/120	130/13903	0.309425
		1	map00909	Sesquiterpenoid and triterpenoid biosynthesis	KEGG PATHWAY	1/120	42/13903	0.305543
		2	map00562	Inositol phosphate metabolism	KEGG PATHWAY	2/120	83/13903	0.16078
		2	map04218	Cellular senescence	KEGG PATHWAY	2/120	127/13903	0.299863
		2	map05225	Hepatocellular carcinoma	KEGG PATHWAY	2/120	117/13903	0.267879
		1	map00565	Ether lipid metabolism	KEGG PATHWAY	1/120	38/13903	0.280969
		1	map00600	Sphingolipid metabolism	KEGG PATHWAY	1/120	34/13903	0.255534
		1	map04934	Cushing syndrome	KEGG PATHWAY	1/120	41/13903	0.299479
		1	map00460	Cyanoamino acid metabolism	KEGG PATHWAY	1/120	60/13903	0.406212
		1	map00400	Phenylalanine, tyrosine and tryptophan biosynthesis	KEGG PATHWAY	1/120	58/13903	0.395783
		1	map00450	Selenocompound metabolism	KEGG PATHWAY	1/120	20/13903	0.159277
		1	map03030	DNA replication	KEGG PATHWAY	1/120	119/13903	0.645128
		1	map00270	Cysteine and methionine metabolism	KEGG PATHWAY	1/120	133/13903	0.686033
		1	map02010	ABC transporters	KEGG PATHWAY	1/120	65/13903	0.43151
		1	map03050	Proteasome	KEGG PATHWAY	1/120	65/13903	0.43151
		2	map00230	Purine metabolism	KEGG PATHWAY	2/120	268/13903	0.676388
		1	map00860	Porphyrin and chlorophyll metabolism	KEGG PATHWAY	1/120	55/13903	0.379798
		1	map05226	Gastric cancer	KEGG PATHWAY	1/120	55/13903	0.379798
		1	map04139	Mitophagy - yeast	KEGG PATHWAY	1/120	84/13903	0.518266
		1	map00480	Glutathione metabolism	KEGG PATHWAY	1/120	127/13903	0.669109
		1	map00620	Pyruvate metabolism	KEGG PATHWAY	1/120	118/13903	0.642011
		1	map00310	Lysine degradation	KEGG PATHWAY	1/120	81/13903	0.505497
		1	map00051	Fructose and mannose metabolism	KEGG PATHWAY	1/120	88/13903	0.534784
		1	map04113	Meiosis - yeast	KEGG PATHWAY	1/120	99/13903	0.577368
		3	map03040	Spliceosome	KEGG PATHWAY	3/120	252/13903	0.371203
		1	map00592	alpha-Linolenic acid metabolism	KEGG PATHWAY	1/120	73/13903	0.469782
		1	map04138	Autophagy - yeast	KEGG PATHWAY	1/120	104/13903	0.595424
		1	map00360	Phenylalanine metabolism	KEGG PATHWAY	1/120	93/13903	0.554643
		1	map03008	Ribosome biogenesis in eukaryotes	KEGG PATHWAY	1/120	93/13903	0.554643
		1	map03020	RNA polymerase	KEGG PATHWAY	1/120	115/13903	0.632498
		1	map00564	Glycerophospholipid metabolism	KEGG PATHWAY	1/120	115/13903	0.632498
		1	map00071	Fatty acid degradation	KEGG PATHWAY	1/120	79/13903	0.496798
		1	map04928	Parathyroid hormone synthesis, secretion and action	KEGG PATHWAY	1/120	79/13903	0.496798
		1	map03430	Mismatch repair	KEGG PATHWAY	1/120	154/13903	0.738785
		1	map03015	mRNA surveillance pathway	KEGG PATHWAY	1/120	154/13903	0.738785
		1	map04217	Necroptosis	KEGG PATHWAY	1/120	113/13903	0.626018
		2	map04714	Thermogenesis	KEGG PATHWAY	2/120	344/13903	0.80123
		2	map00190	Oxidative phosphorylation	KEGG PATHWAY	2/120	358/13903	0.818969
		1	map00240	Pyrimidine metabolism	KEGG PATHWAY	1/120	226/13903	0.861269
		1	map00261	Monobactam biosynthesis	KEGG PATHWAY	1/120	11/13903	0.0909818
		1	map03013	RNA transport	KEGG PATHWAY	1/120	218/13903	0.851139
		2	map04011	MAPK signaling pathway - yeast	KEGG PATHWAY	2/120	81/13903	0.154729
		2	map00900	Terpenoid backbone biosynthesis	KEGG PATHWAY	2/120	81/13903	0.154729
		1	map04141	Protein processing in endoplasmic reticulum	KEGG PATHWAY	1/120	324/13903	0.941688
		2	map03010	Ribosome	KEGG PATHWAY	2/120	489/13903	0.927675
		1	map03450	Non-homologous end-joining	KEGG PATHWAY	1/120	18/13903	0.144554
		3	map05165	Human papillomavirus infection	KEGG PATHWAY	3/120	147/13903	0.134146
		2	map00052	Galactose metabolism	KEGG PATHWAY	2/120	73/13903	0.131023
